# Supplementary material for: Lifetime risk of rheumatoid arthritis-associated interstitial lung disease in MUC5B mutation carriers
Source: PubMed Central journal article supplement (PMC8600604; doi:10.1136/annrheumdis-2021-220698), 2021-08-03
Supplement: annrheumdis-2021-220698supp001.pdf [file annrheumdis-2021-220698supp001.pdf]

**Supplementary Table 1.** Effect of rheumatoid arthritis (RA) and MUC5B on risk of interstitial lung disease (ILD), accounting for competing risks (non-ILD related death).

|                      | <b>Population</b> | <b>MUC5B</b>           | <b>RA</b>              | <b>RA and MUC5B</b>    |
|----------------------|-------------------|------------------------|------------------------|------------------------|
| Risk of ILD in men   |                   |                        |                        |                        |
| Lifetime risk, %     | 1.5 %             | 4.8 %                  | 8.5 %                  | 19.5 %                 |
| HR (95% CI)          | Reference         | 3.20 (2.84-3.62)       | 6.00 (4.66-7.73)       | 11.7 (8.52-16.1)       |
| p-value              | -                 | $4.13 \times 10^{-79}$ | $7.21 \times 10^{-44}$ | $1.79 \times 10^{-51}$ |
| Risk of ILD in women |                   |                        |                        |                        |
| Lifetime risk, %     | 1.1 %             | 2.9 %                  | 4.6 %                  | 14.1 %                 |
| HR (95% CI)          | Reference         | 2.64 (2.25-3.09)       | 4.54 (3.57-5.77)       | 12.6 (9.49-16.7)       |
| p-value              | -                 | $1.64 \times 10^{-33}$ | $2.68 \times 10^{-35}$ | $8.91 \times 10^{-70}$ |

**Supplementary Table 2.** Characteristics of the epidemiological and disease-based cohorts, and hospital biobanks (marked with an asterisk) in the FinnGen dataset used in the study.

|                             | Interstitial lung disease |                 |            | Rheumatoid arthritis |                 |            | Mean age at recruitment | Mean age at the end of follow-up or death |
|-----------------------------|---------------------------|-----------------|------------|----------------------|-----------------|------------|-------------------------|-------------------------------------------|
|                             | Number of controls        | Number of cases | Prevalence | Number of controls   | Number of cases | Prevalence |                         |                                           |
| AURIA BIOBANK*              | 31371                     | 208             | 0.66 %     | 30433                | 1146            | 3.63 %     | 62.8                    | 64.0                                      |
| BIOBANK OF CENTRAL FINLAND* | 7957                      | 54              | 0.67 %     | 7547                 | 464             | 5.79 %     | 58.6                    | 59.6                                      |
| BIOBANK OF EASTERN FINLAND* | 9798                      | 62              | 0.63 %     | 9456                 | 404             | 4.10 %     | 62.2                    | 63.1                                      |
| BLOOD SERVICE BIOBANK       | 34330                     | 14              | 0.04 %     | 34315                | 29              | 0.08 %     | 43.6                    | 44.7                                      |
| BOREALIS BIOBANK*           | 8657                      | 96              | 1.10 %     | 8372                 | 381             | 4.35 %     | 62.6                    | 63.8                                      |
| HELSINKI BIOBANK*           | 60819                     | 502             | 0.82 %     | 59440                | 1881            | 3.07 %     | 56.9                    | 58.3                                      |
| TAMPERE BIOBANK*            | 20147                     | 218             | 1.07 %     | 19725                | 640             | 3.14 %     | 56.7                    | 58.1                                      |
| TERVEYSTALO BIOBANK         | 6644                      | 11              | 0.17 %     | 6498                 | 157             | 2.36 %     | 51.0                    | 50.7                                      |
| THL BIOBANK ATBC            | 8446                      | 102             | 1.19 %     | 8472                 | 76              | 0.89 %     | 62.9                    | 77.0                                      |
| THL BIOBANK BOTNIA          | 11441                     | 40              | 0.35 %     | 11348                | 133             | 1.16 %     | 51.5                    | 68.3                                      |
| THL BIOBANK COROGENE        | 4377                      | 69              | 1.55 %     | 4346                 | 100             | 2.25 %     | 65.8                    | 75.6                                      |
| THL BIOBANK FINHEALTH 2017  | 5719                      | 15              | 0.26 %     | 5648                 | 86              | 1.50 %     | 54.6                    | 57.4                                      |
| THL BIOBANK FINRISK 1992    | 4760                      | 32              | 0.67 %     | 4685                 | 107             | 2.23 %     | 44.2                    | 69.7                                      |
| THL BIOBANK FINRISK 1997    | 6799                      | 48              | 0.70 %     | 6712                 | 135             | 1.97 %     | 48.3                    | 68.9                                      |
| THL BIOBANK FINRISK 2002    | 6689                      | 34              | 0.51 %     | 6605                 | 118             | 1.76 %     | 47.9                    | 64.8                                      |
| THL BIOBANK FINRISK 2007    | 4969                      | 27              | 0.54 %     | 4896                 | 100             | 2.00 %     | 51.2                    | 63.6                                      |
| THL BIOBANK FINRISK 2012    | 5093                      | 12              | 0.24 %     | 5021                 | 84              | 1.65 %     | 51.1                    | 58.8                                      |
| THL BIOBANK HEALTH 2000     | 6293                      | 19              | 0.30 %     | 6190                 | 122             | 1.93 %     | 55.7                    | 72.0                                      |
| THL BIOBANK HHS             | 3253                      | 39              | 1.18 %     | 3266                 | 26              | 0.79 %     | 47.5                    | 79.0                                      |
| THL BIOBANK MIGRAINE        | 7700                      | 28              | 0.36 %     | 7610                 | 118             | 1.53 %     | 44.8                    | 58.6                                      |
| THL BIOBANK SUPER           | 8249                      | 16              | 0.19 %     | 8222                 | 43              | 0.52 %     | 46.9                    | 49.3                                      |
| THL BIOBANK T1D             | 9891                      | 28              | 0.28 %     | 9701                 | 218             | 2.20 %     | 32.7                    | 52.0                                      |
| THL BIOBANK TWINS           | 11003                     | 98              | 0.88 %     | 10892                | 209             | 1.88 %     | 48.5                    | 68.9                                      |
| Other                       | 7602                      | 193             | 2.48 %     | 7703                 | 92              | 1.18 %     | 54.8                    | 58.8                                      |

**Supplementary Table 3.** Diseases excluded from the study. We excluded from all analyses 11,808 individuals without rheumatoid arthritis who had at least one record for any of these diseases.

|                                     | Hospital discharge registry |       |             | Hospital discharge registry codes to exclude | Cause of death registry |       |             | Cause of death registry codes to exclude | Kela* reimbursement codes |
|-------------------------------------|-----------------------------|-------|-------------|----------------------------------------------|-------------------------|-------|-------------|------------------------------------------|---------------------------|
|                                     | ICD-10                      | ICD-9 | ICD-8       | ICD-9                                        | ICD-10                  | ICD-9 | ICD-8       | ICD-9                                    |                           |
| <b>Systemic lupus erythematosus</b> | M32                         | 7100  | 7431        |                                              | M32                     | 7100  | 7431        |                                          |                           |
| <b>Inflammatory bowel disease</b>   |                             |       |             |                                              |                         |       |             |                                          |                           |
| Crohn disease                       | K50                         | 555   | 5630        |                                              | K50                     | 555   | 5630        |                                          |                           |
| Ulcerative colitis                  | K51                         | 556   | 5631 or 569 | 5564A                                        | K51                     | 556   | 5631 or 569 | 5564A                                    |                           |
| IBD patients in Kela*-register      |                             |       |             |                                              |                         |       |             |                                          | 208 or 209                |
| <b>Systemic sclerosis</b>           | M34                         | 7101  | 7340        |                                              | M34                     | 7101  | 7340        |                                          |                           |
| <b>Ankylosing spondylitis</b>       | M45                         | 7200  | 7124        |                                              | M45                     | 7200  | 7124        |                                          |                           |
| <b>Dermatopolymyositis</b>          | M33                         |       |             |                                              | M33                     |       |             |                                          |                           |
| Juvenile dermatomyositis            | M330                        | 7103A |             |                                              | M330                    | 7103A |             |                                          |                           |
| Other dermatomyositis               | M331                        | 7103B | 7160        |                                              | M331                    | 7103B | 7160        |                                          |                           |
| Polymyositis                        | M332                        | 7104  | 7161        |                                              | M332                    | 7104  | 7161        |                                          |                           |
| Dermatopolymyositis, unspecified    | M339                        |       |             |                                              | M339                    |       |             |                                          |                           |
| <b>Myositis</b>                     | M60                         | 7280  | 732         |                                              | M60                     | 7280  | 732         |                                          |                           |

\*KELA = the Social insurance Institute of Finland

## Supplementary Methods

### Diseases

FinnGen is a collection of prospective epidemiological and disease-based cohorts and hospital biobank samples, aiming for a collection of 500,000 genotype samples from Finnish individuals by 2023. The study uses FinnGen data freeze 7. Further information about the subcohorts included in FinnGen can be found in **Supplementary Table 2**.

Age at RA onset was defined through the first registered diagnosis in the registries (age  $\geq 16$  at diagnosis accepted as case). Age at ILD diagnosis was defined through the first registered diagnosis in the registries (at death, if death was the only event; age  $\geq 16$  at diagnosis accepted as case, with 8 individuals excluded due to diagnosis under age 16). 630 individuals were excluded due to no further healthcare contacts with ILD within 5 years after the initial diagnosis (individuals with ILD death as first event considered as cases). Competing risks were defined as any non-ILD related cause of death identified from the registry on causes of death. We excluded from all analyses a further 11,808 individuals without RA who had at least one record for any of the following diseases: systemic lupus erythematosus, inflammatory bowel disease, systemic sclerosis, ankylosing spondylitis, dermatomyositis, or myositis (**Supplementary Table 3**). The full FinnGen Data Freeze 7 consists of 306,418 adults (age  $\geq 18$ ), and with the exclusions listed above, the final sample size was 293,972.

### Genotyping and imputation

The samples are genotyped with Illumina and Affymetrix arrays (Illumina Inc., San Diego, and Thermo Fisher Scientific, Santa Clara, CA, USA). Individuals with ambiguous gender, high genotype missingness ( $>5\%$ ), excess heterozygosity ( $\pm 4SD$ ) and non-Finnish ancestry were excluded, as well as all variants with high missingness ( $>2\%$ ), low Hardy–Weinberg equilibrium p-value ( $<1e-6$ ) and minor allele count ( $MAC < 3$ ). Array data pre-phasing was carried out with Eagle 2.3.527 with the number of conditioning haplotypes set to 20,000. The genotypes have been imputed with using the SISu v3 population-specific reference panel developed from high-quality data for 3,775 high-coverage (25–30x) whole-genome sequencing in Finns. The detailed genotype imputation workflow can be found at <https://dx.doi.org/10.17504/protocols.io.xbgfijw>. The dataset uses genome build 38 (hg38). Variant extraction from VCF files with PLINK v2.00a2.3LM.45 using `--export A`. The HWE p-value for rs35705950 was 0.18.

### Replication in UK Biobank

UK Biobank is a prospective cohort study comprising approximately 500,000 individuals from across the United Kingdom, aged between 40 and 69 at recruitment. The cohort contains deep phenotyping, including biological measurements, lifestyle factors, and blood biomarkers. The dataset has been imputed using the merged UK10K and 1000 Genomes (phase 3) reference panels.<sup>1</sup> Details on the cohort, as well as data generation and imputation have been previously described.<sup>2</sup> RA was defined as at least two contacts with ICD-10 codes beginning with M05 (seropositive RA) or M06 (seronegative RA) in the inpatient hospital data (data field 41270; age for earliest visit from data field 41280). The sample size in the UK Biobank analysis was 343,676 (White British individuals unrelated based on KING kinship coefficient <0.0442). We identified 1,911 RA cases (1,368 women), with their mean age at RA onset at 58.5 years (s.d. 8.9 years). This analysis was conducted with the UK Biobank Resource under Application Number 22627.

### Statistical analysis

With age as time scale, all regression models were stratified by sex, adjusting for ten principal components of ancestry, as well as genotyping array (FinnGen and UK Biobank), cohort (FinnGen), and batch (UK Biobank). The proportional hazards assumption was evaluated by Schoenfeld residuals and log–log inspection. Meta-analysis was performed by inverse-variance weighting. Competing risk models were performed by fitting the Fine and Gray proportional subdistribution hazards regression model using the R package *cmprsk*. Function *crr()* was used for obtaining sex-specific effect sizes with 95% confidence intervals (CIs) with the covariates inputted as a numerical covariate matrix. The lifetime risks were estimated with *cuminc()*, which estimates the cumulative incidence functions from the output generated by *crr()*. All tests were two-tailed.

### Supplementary References

1. Huang, J., *et al.* Improved imputation of low-frequency and rare variants using the UK10K haplotype reference panel. *Nat Commun* **6**, 8111 (2015).
2. Bycroft, C., *et al.* The UK Biobank resource with deep phenotyping and genomic data. *Nature* **562**, 203-209 (2018).

## FinnGen Rheumatology Clinical Expert Group

|                         |                                                                                      |
|-------------------------|--------------------------------------------------------------------------------------|
| Kari Eklund             | Hospital District of Helsinki and Uusimaa, Helsinki, Finland                         |
| Antti Palomäki          | Hospital District of Southwest Finland, Turku, Finland                               |
| Pia Isomaki             | Pirkanmaa Hospital District, Tampere, Finland                                        |
| Laura Pirilä            | Hospital District of Southwest Finland, Turku, Finland                               |
| Oili Kaipainen-Seppänen | Northern Savo Hospital District, Kuopio, Finland                                     |
| Johanna Huhtakangas     | Northern Savo Hospital District, Kuopio, Finland                                     |
| Ali Abbasi              | Abbvie, Chicago, IL, United States                                                   |
| Jeffrey Waring          | Abbvie, Chicago, IL, United States                                                   |
| Fedik Rahimov           | Abbvie, Chicago, IL, United States                                                   |
| Apinya Lertratanakul    | Abbvie, Chicago, IL, United States                                                   |
| Nizar Smaoui            | Abbvie, Chicago, IL, United States                                                   |
| Anne Lehtonen           | Abbvie, Chicago, IL, United States                                                   |
| Adam Platt              | Astra Zeneca, Cambridge, United Kingdom                                              |
| David Close             | Astra Zeneca, Cambridge, United Kingdom                                              |
| Marla Hochfeld          | Celgene, Summit, NJ, United States/Bristol Myers Squibb, New York, NY, United States |
| Natalie Bowers          | Genentech, San Francisco, CA, United States                                          |
| Sarah Pendergrass       | Genentech, San Francisco, CA, United States                                          |
| Onuralp Soylemez        | Merck, Kenilworth, NJ, United States                                                 |
| Kirsi Kalpala           | Pfizer, New York, NY, United States                                                  |
| Nan Bing                | Pfizer, New York, NY, United States                                                  |
| Xinli Hu                | Pfizer, New York, NY, United States                                                  |
| Kirsi Auro              | GlaxoSmithKline, Brentford, United Kingdom                                           |
| Dawn Waterworth         | Janssen Biotech, Beerse, Belgium                                                     |
| Andrea Ganna            | Institute for Molecular Medicine Finland, HiLIFE, Helsinki, Finland, Finland         |
| Anne Kerola             | University of Helsinki                                                               |
| Hanna-Kaisa Heikkilä    | Pirkanmaa Hospital District, Tampere, Finland                                        |
| Javier Gracia Tabuena   | University of Tampere                                                                |
| Johanna Hiltunen        | Hospital District of Helsinki and Uusimaa, Helsinki, Finland                         |
| Johanna Palta           | Hospital District of Southwest Finland, Turku, Finland                               |
| Juha Sinisalo           | Hospital District of Helsinki and Uusimaa, Helsinki, Finland                         |
| Jukka Koskela           | Institute for Molecular Medicine Finland, HiLIFE, Helsinki, Finland, Finland         |
| Nina Mars               | Institute for Molecular Medicine Finland, HiLIFE, Helsinki, Finland, Finland         |
| Tarja Laitinen          | University of Tampere                                                                |
| Tuulikki Sokka-Isler    | Jyväskylä Central Hospital                                                           |
| Vincent Llorens         | Institute for Molecular Medicine Finland, HiLIFE, Helsinki, Finland, Finland         |

## FinnGen

### Steering Committee

Aarno Palotie Institute for Molecular Medicine Finland, HiLIFE, University of Helsinki, Finland

Mark Daly Institute for Molecular Medicine Finland, HiLIFE, University of Helsinki, Finland

### Pharmaceutical companies

Bridget Riley-Gills Abbvie, Chicago, IL, United States  
 Howard Jacob Abbvie, Chicago, IL, United States  
 Dirk Paul Astra Zeneca, Cambridge, United Kingdom  
 Heiko Runz Biogen, Cambridge, MA, United States  
 Sally John Biogen, Cambridge, MA, United States  
 Robert Plenge Celgene, Summit, NJ, United States/Bristol Myers Squibb, New York, NY, United States  
 Mark McCarthy Genentech, San Francisco, CA, United States  
 Julie Hunkapiller Genentech, San Francisco, CA, United States  
 Meg Ehm GlaxoSmithKline, Brentford, United Kingdom  
 Kirsi Auro GlaxoSmithKline, Brentford, United Kingdom  
 Caroline Fox Merck, Kenilworth, NJ, United States  
 Anders Mälarstig Pfizer, New York, NY, United States  
 Katherine Klinger Sanofi, Paris, France  
 Deepak Raipal Sanofi, Paris, France  
 Tim Behrens Maze Therapeutics, San Francisco, CA, United States  
 Robert Yang Janssen Biotech, Beerse, Belgium  
 Richard Siegel Novartis, Basel, Switzerland

### University of Helsinki & Biobanks

Tomi Mäkelä HiLIFE, University of Helsinki, Finland, Finland  
 Jaakko Kaprio Institute for Molecular Medicine Finland, HiLIFE, Helsinki, Finland, Finland  
 Petri Virolainen Auria Biobank / University of Turku / Hospital District of Southwest Finland, Turku, Finland  
 Antti Hakanen Auria Biobank / University of Turku / Hospital District of Southwest Finland, Turku, Finland  
 Terhi Kilpi THL Biobank / The National Institute of Health and Welfare Helsinki, Finland  
 Markus Perola THL Biobank / The National Institute of Health and Welfare Helsinki, Finland  
 Jukka Partanen Finnish Red Cross Blood Service / Finnish Hematology Registry and Clinical Biobank, Helsinki, Finland  
 Anne Pitkäranta Helsinki Biobank / Helsinki University and Hospital District of Helsinki and Uusimaa, Helsinki  
 Juhani Junttila Northern Finland Biobank Borealis / University of Oulu / Northern Ostrobothnia Hospital District, Oulu, Finland  
 Raisa Serpi Northern Finland Biobank Borealis / University of Oulu / Northern Ostrobothnia Hospital District, Oulu, Finland  
 Tarja Laitinen Finnish Clinical Biobank Tampere / University of Tampere / Pirkanmaa Hospital District, Tampere, Finland

Johanna Mäkelä Finnish Clinical Biobank Tampere / University of Tampere / Pirkanmaa Hospital District, Tampere, Finland  
 Veli-Matti Kosma Biobank of Eastern Finland / University of Eastern Finland / Northern Savo Hospital District, Kuopio, Finland  
 Urho Kujala Central Finland Biobank / University of Jyväskylä / Central Finland Health Care District, Jyväskylä, Finland

#### **Other Experts/ Non-Voting Members**

Outi Tuovila Business Finland, Helsinki, Finland  
 Raimo Pakkanen Business Finland, Helsinki, Finland

#### **Scientific Committee**

##### **Pharmaceutical companies**

Jeffrey Waring Abbvie, Chicago, IL, United States  
 Ali Abbasi Abbvie, Chicago, IL, United States  
 Mengzhen Liu Abbvie, Chicago, IL, United States  
 Ioanna Tachmazidou Astra Zeneca, Cambridge, United Kingdom  
 Chia-Yen Chen Biogen, Cambridge, MA, United States  
 Heiko Runz Biogen, Cambridge, MA, United States  
 Shameek Biswas Celgene, Summit, NJ, United States/Bristol Myers Squibb, New York, NY, United States  
 Julie Hunkapiller Genentech, San Francisco, CA, United States  
 Meg Ehm GlaxoSmithKline, Brentford, United Kingdom  
 Neha Raghavan Merck, Kenilworth, NJ, United States  
 Adriana Huertas-Vazquez Merck, Kenilworth, NJ, United States  
 Anders Mälärstig Pfizer, New York, NY, United States  
 Xinli Hu Pfizer, New York, NY, United States  
 Katherine Klinger Sanofi, Paris, France  
 Matthias Gossel Sanofi, Paris, France  
 Robert Graham Maze Therapeutics, San Francisco, CA, United States  
 Tim Behrens Maze Therapeutics, San Francisco, CA, United States  
 Beryl Cummings Maze Therapeutics, San Francisco, CA, United States  
 Wilco Fleuren Janssen Biotech, Beerse, Belgium  
 Dawn Waterworth Janssen Biotech, Beerse, Belgium  
 Nicole Renaud Novartis, Basel, Switzerland  
 Ma'en Obeidat Novartis, Basel, Switzerland

##### **University of Helsinki & Biobanks**

Samuli Ripatti Institute for Molecular Medicine Finland, HiLIFE, Helsinki, Finland  
 Johanna Schleutker Auria Biobank / Univ. of Turku / Hospital District of Southwest Finland, Turku, Finland  
 Markus Perola THL Biobank / The National Institute of Health and Welfare Helsinki, Finland  
 Mikko Arvas Finnish Red Cross Blood Service / Finnish Hematology Registry and Clinical Biobank, Helsinki, Finland  
 Olli Carpén Helsinki Biobank / Helsinki University and Hospital District of Helsinki and Uusimaa, Helsinki



Reetta Hinttala Northern Finland Biobank Borealis / University of Oulu / Northern Ostrobothnia Hospital District, Oulu, Finland  
 Johannes Kettunen Northern Finland Biobank Borealis / University of Oulu / Northern Ostrobothnia Hospital District, Oulu, Finland  
 Johanna Mäkelä Finnish Clinical Biobank Tampere / University of Tampere / Pirkanmaa Hospital District, Tampere, Finland  
 Arto Mannermaa Biobank of Eastern Finland / University of Eastern Finland / Northern Savo Hospital District, Kuopio, Finland  
 Jari Laukkanen Central Finland Biobank / University of Jyväskylä / Central Finland Health Care District, Jyväskylä, Finland  
 Urho Kujala Central Finland Biobank / University of Jyväskylä / Central Finland Health Care District, Jyväskylä, Finland

### Clinical Groups

#### Neurology Group

Reetta Kälviäinen Northern Savo Hospital District, Kuopio, Finland  
 Valtteri Julkunen Northern Savo Hospital District, Kuopio, Finland  
 Hilikka Soininen Northern Savo Hospital District, Kuopio, Finland  
 Anne Remes Northern Ostrobothnia Hospital District, Oulu, Finland  
 Mikko Hiltunen Northern Savo Hospital District, Kuopio, Finland  
 Jukka Peltola Pirkanmaa Hospital District, Tampere, Finland  
 Pentti Tienari Hospital District of Helsinki and Uusimaa, Helsinki, Finland  
 Juha Rinne Hospital District of Southwest Finland, Turku, Finland  
 Roosa Kallionpää Hospital District of Southwest Finland, Turku, Finland  
 Ali Abbasi Abbvie, Chicago, IL, United States  
 Adam Ziemann Abbvie, Chicago, IL, United States  
 Jeffrey Waring Abbvie, Chicago, IL, United States  
 Sahar Esmaeeli Abbvie, Chicago, IL, United States  
 Nizar Smaoui Abbvie, Chicago, IL, United States  
 Anne Lehtonen Abbvie, Chicago, IL, United States  
 Susan Eaton Biogen, Cambridge, MA, United States  
 Heiko Runz Biogen, Cambridge, MA, United States  
 Sanni Lahdenperä Biogen, Cambridge, MA, United States  
 Janet van Adelsberg Celgene, Summit, NJ, United States/ Bristol Myers Squibb, New York, NY, United States  
 Shameek Biswas Celgene, Summit, NJ, United States/ Bristol Myers Squibb, New York, NY, United States  
 Julie Hunkapiller Genentech, San Francisco, CA, United States  
 Natalie Bowers Genentech, San Francisco, CA, United States  
 Edmond Teng Genentech, San Francisco, CA, United States  
 Sarah Pendergrass Genentech, San Francisco, CA, United States  
 Onuralp Soylemez Merck, Kenilworth, NJ, United States  
 Kari Linden Pfizer, New York, NY, United States  
 Fanli Xu GlaxoSmithKline, Brentford, United Kingdom  
 David Pulford GlaxoSmithKline, Brentford, United Kingdom  
 Kirsi Auro GlaxoSmithKline, Brentford, United Kingdom  
 Laura Addis GlaxoSmithKline, Brentford, United Kingdom

John Eicher GlaxoSmithKline, Brentford, United Kingdom  
 Minna Raivio Hospital District of Helsinki and Uusimaa, Helsinki, Finland  
 Sarah Pendergrass Genentech, San Francisco, CA, United States  
 Beryl Cummings Maze Therapeutics, San Francisco, CA, United States  
 Juulia Partanen Institute for Molecular Medicine Finland, HiLIFE, University of Helsinki, Finland

### Gastroenterology Group

Martti Färkkilä Hospital District of Helsinki and Uusimaa, Helsinki, Finland  
 Jukka Koskela Hospital District of Helsinki and Uusimaa, Helsinki, Finland  
 Sampsa Pikkarainen Hospital District of Helsinki and Uusimaa, Helsinki, Finland  
 Airi Jussila Pirkanmaa Hospital District, Tampere, Finland  
 Katri Kaukinen Pirkanmaa Hospital District, Tampere, Finland  
 Timo Blomster Northern Ostrobothnia Hospital District, Oulu, Finland  
 Mikko Kiviniemi Northern Savo Hospital District, Kuopio, Finland  
 Markku Voutilainen Hospital District of Southwest Finland, Turku, Finland  
 Ali Abbasi Abbvie, Chicago, IL, United States  
 Graham Heap Abbvie, Chicago, IL, United States  
 Jeffrey Waring Abbvie, Chicago, IL, United States  
 Nizar Smaoui Abbvie, Chicago, IL, United States  
 Fedik Rahimov Abbvie, Chicago, IL, United States  
 Anne Lehtonen Abbvie, Chicago, IL, United States  
 Keith Usiskin Celgene, Summit, NJ, United States/ Bristol Myers Squibb, New York, NY, United States  
 Tim Lu Genentech, San Francisco, CA, United States  
 Natalie Bowers Genentech, San Francisco, CA, United States  
 Danny Oh Genentech, San Francisco, CA, United States  
 Sarah Pendergrass Genentech, San Francisco, CA, United States  
 Kirsi Kalpala Pfizer, New York, NY, United States  
 Melissa Miller Pfizer, New York, NY, United States  
 Xinli Hu Pfizer, New York, NY, United States  
 Linda McCarthy GlaxoSmithKline, Brentford, United Kingdom  
 Onuralp Soylemez Merck, Kenilworth, NJ, United States  
 Mark Daly Institute for Molecular Medicine Finland, HiLIFE, University of Helsinki, Finland

### Pulmonology Group

Tarja Laitinen Pirkanmaa Hospital District, Tampere, Finland  
 Margit Pelkonen Northern Savo Hospital District, Kuopio, Finland  
 Paula Kauppi Hospital District of Helsinki and Uusimaa, Helsinki, Finland  
 Hannu Kankaanranta Pirkanmaa Hospital District, Tampere, Finland  
 Terttu Harju Northern Ostrobothnia Hospital District, Oulu, Finland  
 Riitta Lahesmaa Hospital District of Southwest Finland, Turku, Finland  
 Nizar Smaoui Abbvie, Chicago, IL, United States  
 Alex Mackay Astra Zeneca, Cambridge, United Kingdom  
 Glenda Lassi Astra Zeneca, Cambridge, United Kingdom  
 Susan Eaton Biogen, Cambridge, MA, United States

Steven Greenberg Celgene, Summit, NJ, United States/ Bristol Myers Squibb, New York, NY, United States  
 Hubert Chen Genentech, San Francisco, CA, United States  
 Sarah Pendergrass Genentech, San Francisco, CA, United States  
 Natalie Bowers Genentech, San Francisco, CA, United States  
 Joanna Betts GlaxoSmithKline, Brentford, United Kingdom  
 Soumitra Ghosh GlaxoSmithKline, Brentford, United Kingdom  
 Kirsi Auro GlaxoSmithKline, Brentford, United Kingdom  
 Rajashree Mishra GlaxoSmithKline, Brentford, United Kingdom  
 Sina R ueger Institute for Molecular Medicine Finland, HiLIFE, University of Helsinki, Finland

### Cardiometabolic Diseases Group

Teemu Niiranen The National Institute of Health and Welfare Helsinki, Finland  
 Felix Vaura The National Institute of Health and Welfare Helsinki, Finland  
 Veikko Salomaa The National Institute of Health and Welfare Helsinki, Finland  
 Markus Juonala Hospital District of Southwest Finland, Turku, Finland  
 Kaj Mets arinne Hospital District of Southwest Finland, Turku, Finland  
 Mika K ah onen Pirkanmaa Hospital District, Tampere, Finland  
 Juhani Junttila Northern Ostrobothnia Hospital District, Oulu, Finland  
 Markku Laakso Northern Savo Hospital District, Kuopio, Finland  
 Jussi Pihlajam aki Northern Savo Hospital District, Kuopio, Finland  
 Daniel Gordin Hospital District of Helsinki and Uusimaa, Helsinki, Finland  
 Juha Sinisalo Hospital District of Helsinki and Uusimaa, Helsinki, Finland  
 Marja-Riitta Taskinen Hospital District of Helsinki and Uusimaa, Helsinki, Finland  
 Tiinamaija Tuomi Hospital District of Helsinki and Uusimaa, Helsinki, Finland  
 Jari Laukkanen Central Finland Health Care District, Jyv askyl a, Finland  
 Benjamin Challis Astra Zeneca, Cambridge, United Kingdom  
 Dirk Paul Astra Zeneca, Cambridge, United Kingdom  
 Julie Hunkapiller Genentech, San Francisco, CA, United States  
 Natalie Bowers Genentech, San Francisco, CA, United States  
 Sarah Pendergrass Genentech, San Francisco, CA, United States  
 Onuralp Soylemez Merck, Kenilworth, NJ, United States  
 Jaakko Parkkinen Pfizer, New York, NY, United States  
 Melissa Miller Pfizer, New York, NY, United States  
 Russell Miller Pfizer, New York, NY, United States  
 Audrey Chu GlaxoSmithKline, Brentford, United Kingdom  
 Kirsi Auro GlaxoSmithKline, Brentford, United Kingdom  
 Keith Usiskin Celgene, Summit, NJ, United States/ Bristol Myers Squibb, New York, NY, United States  
 Amanda Elliott Institute for Molecular Medicine Finland, HiLIFE, University of Helsinki, Finland / Broad Institute, Cambridge, MA, United States  
 Joel R am o Institute for Molecular Medicine Finland, HiLIFE, University of Helsinki, Finland  
 Samuli Ripatti Institute for Molecular Medicine Finland, HiLIFE, University of Helsinki, Finland

Mary Pat Reeve Institute for Molecular Medicine Finland, HiLIFE, University of Helsinki, Finland  
 Sanni Ruotsalainen Institute for Molecular Medicine Finland, HiLIFE, University of Helsinki, Finland

### **Oncology Group**

Tuomo Meretoja Hospital District of Helsinki and Uusimaa, Helsinki, Finland  
 Heikki Joensuu Hospital District of Helsinki and Uusimaa, Helsinki, Finland  
 Olli Carpén Hospital District of Helsinki and Uusimaa, Helsinki, Finland  
 Lauri Aaltonen Hospital District of Helsinki and Uusimaa, Helsinki, Finland  
 Johanna Mattson Hospital District of Helsinki and Uusimaa, Helsinki, Finland  
 Annika Auranen Pirkanmaa Hospital District, Tampere, Finland  
 Peeter Karihtala Northern Ostrobothnia Hospital District, Oulu, Finland  
 Saira Kauppila Northern Ostrobothnia Hospital District, Oulu, Finland  
 Päivi Auvinen Northern Savo Hospital District, Kuopio, Finland  
 Klaus Elenius Hospital District of Southwest Finland, Turku, Finland  
 Johanna Schleutker Hospital District of Southwest Finland, Turku, Finland  
 Relja Popovic Abbvie, Chicago, IL, United States  
 Jeffrey Waring Abbvie, Chicago, IL, United States  
 Bridget Riley-Gillis Abbvie, Chicago, IL, United States  
 Anne Lehtonen Abbvie, Chicago, IL, United States  
 Jennifer Schutzman Genentech, San Francisco, CA, United States  
 Julie Hunkapiller Genentech, San Francisco, CA, United States  
 Natalie Bowers Genentech, San Francisco, CA, United States  
 Sarah Pendergrass Genentech, San Francisco, CA, United States  
 Andrey Loboda Merck, Kenilworth, NJ, United States  
 Aparna Chhibber Merck, Kenilworth, NJ, United States  
 Heli Lehtonen Pfizer, New York, NY, United States  
 Stefan McDonough Pfizer, New York, NY, United States  
 Marika Crohns Sanofi, Paris, France  
 Sauli Vuoti Sanofi, Paris, France  
 Diptee Kulkarni GlaxoSmithKline, Brentford, United Kingdom  
 Kirsi Auro GlaxoSmithKline, Brentford, United Kingdom  
 Esa Pitkänen Institute for Molecular Medicine Finland, HiLIFE, University of Helsinki, Finland  
 Nina Mars Institute for Molecular Medicine Finland, HiLIFE, University of Helsinki, Finland  
 Mark Daly Institute for Molecular Medicine Finland, HiLIFE, University of Helsinki, Finland

### **Ophthalmology Group**

Kai Kaarniranta Northern Savo Hospital District, Kuopio, Finland  
 Joni A Turunen Hospital District of Helsinki and Uusimaa, Helsinki, Finland  
 Terhi Ollila Hospital District of Helsinki and Uusimaa, Helsinki, Finland  
 Sanna Seitsonen Hospital District of Helsinki and Uusimaa, Helsinki, Finland  
 Hannu Uusitalo Pirkanmaa Hospital District, Tampere, Finland  
 Vesa Aaltonen Hospital District of Southwest Finland, Turku, Finland  
 Hannele Uusitalo-Järvinen Pirkanmaa Hospital District, Tampere, Finland

Marja Luodonpää Northern Ostrobothnia Hospital District, Oulu, Finland  
 Nina Hautala Northern Ostrobothnia Hospital District, Oulu, Finland  
 Mengzhen Liu Abbvie, Chicago, IL, United States  
 Heiko Runz Biogen, Cambridge, MA, United States  
 Stephanie Loomis Biogen, Cambridge, MA, United States  
 Erich Strauss Genentech, San Francisco, CA, United States  
 Natalie Bowers Genentech, San Francisco, CA, United States  
 Hao Chen Genentech, San Francisco, CA, United States  
 Sarah Pendergrass Genentech, San Francisco, CA, United States  
 Anna Podgoraia Merck, Kenilworth, NJ, United States  
 Juha Karjalainen Institute for Molecular Medicine Finland, HiLIFE, University of Helsinki, Finland / Broad Institute, Cambridge, MA, United States  
 Esa Pitkänen Institute for Molecular Medicine Finland, HiLIFE, University of Helsinki, Finland

### **Dermatology Group**

Kaisa Tasanen Northern Ostrobothnia Hospital District, Oulu, Finland  
 Laura Huilaja Northern Ostrobothnia Hospital District, Oulu, Finland  
 Katariina Hannula-Jouppi Hospital District of Helsinki and Uusimaa, Helsinki, Finland  
 Teea Salmi Pirkanmaa Hospital District, Tampere, Finland  
 Sirkku Peltonen Hospital District of Southwest Finland, Turku, Finland  
 Leena Koulu Hospital District of Southwest Finland, Turku, Finland  
 Kirsi Kalpala Pfizer, New York, NY, United States  
 Ying Wu Pfizer, New York, NY, United States  
 David Choy Genentech, San Francisco, CA, United States  
 Sarah Pendergrass Genentech, San Francisco, CA, United States  
 Nizar Smaoui Abbvie, Chicago, IL, United States  
 Fedik Rahimov Abbvie, Chicago, IL, United States  
 Anne Lehtonen Abbvie, Chicago, IL, United States  
 Dawn Waterworth Janssen Biotech, Beerse, Belgium

### **Odontology Group**

Pirkko Pussinen Hospital District of Helsinki and Uusimaa, Helsinki, Finland  
 Aino Salminen Hospital District of Helsinki and Uusimaa, Helsinki, Finland  
 Tuula Salo Hospital District of Helsinki and Uusimaa, Helsinki, Finland  
 David Rice Hospital District of Helsinki and Uusimaa, Helsinki, Finland  
 Pekka Nieminen Hospital District of Helsinki and Uusimaa, Helsinki, Finland  
 Ulla Palotie Hospital District of Helsinki and Uusimaa, Helsinki, Finland  
 Juha Sinisalo Hospital District of Helsinki and Uusimaa, Helsinki, Finland  
 Maria Siponen Northern Savo Hospital District, Kuopio, Finland  
 Liisa Suominen Northern Savo Hospital District, Kuopio, Finland  
 Päivi Mäntylä Northern Savo Hospital District, Kuopio, Finland  
 Ulvi Gursoy Hospital District of Southwest Finland, Turku, Finland  
 Vuokko Anttonen Northern Ostrobothnia Hospital District, Oulu, Finland  
 Kirsi Sipilä Northern Ostrobothnia Hospital District, Oulu, Finland  
 Sarah Pendergrass Genentech, San Francisco, CA, United States

**Women's Health and Reproduction Group**

|                         |                                                                                   |
|-------------------------|-----------------------------------------------------------------------------------|
| Hannele Laivuori        | Institute for Molecular Medicine Finland, HiLIFE, University of Helsinki, Finland |
| Venla Kurra             | Pirkanmaa Hospital District, Tampere, Finland                                     |
| Oskari Heikinheimo      | Hospital District of Helsinki and Uusimaa, Helsinki, Finland                      |
| Ilkka Kalliala          | Hospital District of Helsinki and Uusimaa, Helsinki, Finland                      |
| Laura Kotaniemi-Talonen | Pirkanmaa Hospital District, Tampere, Finland                                     |
| Kari Nieminen           | Pirkanmaa Hospital District, Tampere, Finland                                     |
| Päivi Polo              | Hospital District of Southwest Finland, Turku, Finland                            |
| Kaarin Mäkikallio       | Hospital District of Southwest Finland, Turku, Finland                            |
| Eeva Ekholm             | Hospital District of Southwest Finland, Turku, Finland                            |
| Marja Väärasmäki        | Northern Ostrobothnia Hospital District, Oulu, Finland                            |
| Outi Uimari             | Northern Ostrobothnia Hospital District, Oulu, Finland                            |
| Laure Morin-Papunen     | Northern Ostrobothnia Hospital District, Oulu, Finland                            |
| Marjo Tuppurainen       | Northern Savo Hospital District, Kuopio, Finland                                  |
| Katja Kivinen           | Institute for Molecular Medicine Finland, HiLIFE, University of Helsinki, Finland |
| Elisabeth Widen         | Institute for Molecular Medicine Finland, HiLIFE, University of Helsinki, Finland |
| Taru Tukiainen          | Institute for Molecular Medicine Finland, HiLIFE, University of Helsinki, Finland |
| Mary Pat Reeve          | Institute for Molecular Medicine Finland, HiLIFE, University of Helsinki, Finland |
| Mark Daly               | Institute for Molecular Medicine Finland, HiLIFE, University of Helsinki, Finland |
| Liu Aoxing              | Institute for Molecular Medicine Finland, HiLIFE, University of Helsinki, Finland |
| Eija Laakkonen          | University of Jyväskylä, Jyväskylä, Finland                                       |
| Niko Välimäki           | University of Helsinki, Helsinki, Finland                                         |
| Lauri Aaltonen          | Hospital District of Helsinki and Uusimaa, Helsinki, Finland                      |
| Johannes Kettunen       | Northern Ostrobothnia Hospital District, Oulu, Finland                            |
| Mikko Arvas             | Finnish Red Cross Blood Service, Helsinki, Finland                                |
| Jeffrey Waring          | Abbvie, Chicago, IL, United States                                                |
| Bridget Riley-Gillis    | Abbvie, Chicago, IL, United States                                                |
| Mengzhen Liu            | Abbvie, Chicago, IL, United States                                                |
| Janet Kumar             | GlaxoSmithKline, Brentford, United Kingdom                                        |
| Kirsi Auro              | GlaxoSmithKline, Brentford, United Kingdom                                        |
| Andrea Ganna            | Institute for Molecular Medicine Finland, HiLIFE, University of Helsinki, Finland |
| Sarah Pendergrass       | Genentech, San Francisco, CA, United States                                       |

**FinnGen Analysis working group**

|                      |                                    |
|----------------------|------------------------------------|
| Justin Wade Davis    | Abbvie, Chicago, IL, United States |
| Bridget Riley-Gillis | Abbvie, Chicago, IL, United States |
| Danjuma Quarless     | Abbvie, Chicago, IL, United States |
| Fedik Rahimov        | Abbvie, Chicago, IL, United States |
| Sahar Esmaeeli       | Abbvie, Chicago, IL, United States |

|                    |                                                                                       |
|--------------------|---------------------------------------------------------------------------------------|
| Slavé Petrovski    | Astra Zeneca, Cambridge, United Kingdom                                               |
| Eleonor Wigmore    | Astra Zeneca, Cambridge, United Kingdom                                               |
| Adele Mitchell     | Biogen, Cambridge, MA, United States                                                  |
| Benjamin Sun       | Biogen, Cambridge, MA, United States                                                  |
| Ellen Tsai         | Biogen, Cambridge, MA, United States                                                  |
| Denis Baird        | Biogen, Cambridge, MA, United States                                                  |
| Paola Bronson      | Biogen, Cambridge, MA, United States                                                  |
| Ruoyu Tian         | Biogen, Cambridge, MA, United States                                                  |
| Stephanie Loomis   | Biogen, Cambridge, MA, United States                                                  |
| Yunfeng Huang      | Biogen, Cambridge, MA, United States                                                  |
| Joseph Maranhville | Celgene, Summit, NJ, United States/ Bristol Myers Squibb, New York, NY, United States |
| Shameek Biswas     | Celgene, Summit, NJ, United States/ Bristol Myers Squibb, New York, NY, United States |
| Elmutaz Mohammed   | Celgene, Summit, NJ, United States/ Bristol Myers Squibb, New York, NY, United States |
| Samir Wadhawan     | Celgene, Summit, NJ, United States/ Bristol Myers Squibb, New York, NY, United States |
| Erika Kvikstad     | Celgene, Summit, NJ, United States/ Bristol Myers Squibb, New York, NY, United States |
| Minal Caliskan     | Celgene, Summit, NJ, United States/ Bristol Myers Squibb, New York, NY, United States |
| Diana Chang        | Genentech, San Francisco, CA, United States                                           |
| Julie Hunkapiller  | Genentech, San Francisco, CA, United States                                           |
| Tushar Bhangale    | Genentech, San Francisco, CA, United States                                           |
| Natalie Bowers     | Genentech, San Francisco, CA, United States                                           |
| Sarah Pendergrass  | Genentech, San Francisco, CA, United States                                           |
| Kirill Shkura      | Merck, Kenilworth, NJ, United States                                                  |
| Victor Neduva      | Merck, Kenilworth, NJ, United States                                                  |
| Xing Chen          | Pfizer, New York, NY, United States                                                   |
| Åsa Hedman         | Pfizer, New York, NY, United States                                                   |
| Karen S King       | GlaxoSmithKline, Brentford, United Kingdom                                            |
| Padhraig Gormley   | GlaxoSmithKline, Brentford, United Kingdom                                            |
| Jimmy Liu          | GlaxoSmithKline, Brentford, United Kingdom                                            |
| Clarence Wang      | Sanofi, Paris, France                                                                 |
| Ethan Xu           | Sanofi, Paris, France                                                                 |
| Franck Auge        | Sanofi, Paris, France                                                                 |
| Clement Chatelain  | Sanofi, Paris, France                                                                 |
| Deepak Rajpal      | Sanofi, Paris, France                                                                 |
| Dongyu Liu         | Sanofi, Paris, France                                                                 |
| Katherine Call     | Sanofi, Paris, France                                                                 |
| Tai-He Xia         | Sanofi, Paris, France                                                                 |
| Beryl Cummings     | Maze Therapeutics, San Francisco, CA, United States                                   |
| Matt Brauer        | Maze Therapeutics, San Francisco, CA, United States                                   |
| Huilei Xu          | Novartis, Basel, Switzerland                                                          |
| Amy Cole           | Novartis, Basel, Switzerland                                                          |
| Jonathan Chung     | Novartis, Basel, Switzerland                                                          |

|                             |                                                                                                                                   |
|-----------------------------|-----------------------------------------------------------------------------------------------------------------------------------|
| Jaison Jacob                | Novartis, Basel, Switzerland                                                                                                      |
| Katrina de Lange            | Novartis, Basel, Switzerland                                                                                                      |
| Jonas Zierer                | Novartis, Basel, Switzerland                                                                                                      |
| Mitja Kurki                 | Institute for Molecular Medicine Finland, HiLIFE, University of Helsinki, Finland / Broad Institute, Cambridge, MA, United States |
| Samuli Ripatti              | Institute for Molecular Medicine Finland, HiLIFE, University of Helsinki, Finland                                                 |
| Mark Daly                   | Institute for Molecular Medicine Finland, HiLIFE, University of Helsinki, Finland                                                 |
| Juha Karjalainen            | Institute for Molecular Medicine Finland, HiLIFE, University of Helsinki, Finland / Broad Institute, Cambridge, MA, United States |
| Aki Havulinna               | Institute for Molecular Medicine Finland, HiLIFE, University of Helsinki, Finland                                                 |
| Juha Mehtonen               | Institute for Molecular Medicine Finland, HiLIFE, University of Helsinki, Finland                                                 |
| Priit Palta                 | Institute for Molecular Medicine Finland, HiLIFE, University of Helsinki, Finland                                                 |
| Shabbeer Hassan             | Institute for Molecular Medicine Finland, HiLIFE, University of Helsinki, Finland                                                 |
| Pietro Della Briotta Parolo | Institute for Molecular Medicine Finland, HiLIFE, University of Helsinki, Finland                                                 |
| Wei Zhou                    | Broad Institute, Cambridge, MA, United States                                                                                     |
| Mutaamba Maasha             | Broad Institute, Cambridge, MA, United States                                                                                     |
| Shabbeer Hassan             | Institute for Molecular Medicine Finland, HiLIFE, University of Helsinki, Finland                                                 |
| Susanna Lemmelä             | Institute for Molecular Medicine Finland, HiLIFE, University of Helsinki, Finland                                                 |
| Manuel Rivas                | University of Stanford, Stanford, CA, United States                                                                               |
| Aarno Palotie               | Institute for Molecular Medicine Finland, HiLIFE, University of Helsinki, Finland                                                 |
| Arto Lehisto                | Institute for Molecular Medicine Finland, HiLIFE, University of Helsinki, Finland                                                 |
| Andrea Ganna                | Institute for Molecular Medicine Finland, HiLIFE, University of Helsinki, Finland                                                 |
| Vincent Llorens             | Institute for Molecular Medicine Finland, HiLIFE, University of Helsinki, Finland                                                 |
| Hannele Laivuori            | Institute for Molecular Medicine Finland, HiLIFE, University of Helsinki, Finland                                                 |
| Mari E Niemi                | Institute for Molecular Medicine Finland, HiLIFE, University of Helsinki, Finland                                                 |
| Taru Tukiainen              | Institute for Molecular Medicine Finland, HiLIFE, University of Helsinki, Finland                                                 |
| Mary Pat Reeve              | Institute for Molecular Medicine Finland, HiLIFE, University of Helsinki, Finland                                                 |
| Henrike Heyne               | Institute for Molecular Medicine Finland, HiLIFE, University of Helsinki, Finland                                                 |



Nina Mars Institute for Molecular Medicine Finland, HiLIFE, University of Helsinki, Finland

Kimmo Palin University of Helsinki, Helsinki, Finland

Javier Garcia-Tabuenca University of Tampere, Tampere, Finland

Harri Siirtola University of Tampere, Tampere, Finland

Tuomo Kiiskinen Institute for Molecular Medicine Finland, HiLIFE, University of Helsinki, Finland

Jiwoo Lee Institute for Molecular Medicine Finland, HiLIFE, University of Helsinki, Finland / Broad Institute, Cambridge, MA, United States

Kristin Tsuo Institute for Molecular Medicine Finland, HiLIFE, University of Helsinki, Finland / Broad Institute, Cambridge, MA, United States

Amanda Elliott Institute for Molecular Medicine Finland, HiLIFE, University of Helsinki, Finland / Broad Institute, Cambridge, MA, United States

Kati Kristiansson THL Biobank / The National Institute of Health and Welfare Helsinki, Finland

Mikko Arvas Finnish Red Cross Blood Service / Finnish Hematology Registry and Clinical Biobank, Helsinki, Finland

Kati Hyvärinen Finnish Red Cross Blood Service, Helsinki, Finland

Jarmo Ritari Finnish Red Cross Blood Service, Helsinki, Finland

Miika Koskinen Helsinki Biobank / Helsinki University and Hospital District of Helsinki and Uusimaa, Helsinki

Olli Carpén Helsinki Biobank / Helsinki University and Hospital District of Helsinki and Uusimaa, Helsinki

Johannes Kettunen Northern Finland Biobank Borealis / University of Oulu / Northern Ostrobothnia Hospital District, Oulu, Finland

Katri Pylkäs University of Oulu, Oulu, Finland

Marita Kalaoja University of Oulu, Oulu, Finland

Minna Karjalainen University of Oulu, Oulu, Finland

Tuomo Mantere Northern Finland Biobank Borealis / University of Oulu / Northern Ostrobothnia Hospital District, Oulu, Finland

Eeva Kangasniemi Finnish Clinical Biobank Tampere / University of Tampere / Pirkanmaa Hospital District, Tampere, Finland

Sami Heikkinen University of Eastern Finland, Kuopio, Finland

Arto Mannermaa Biobank of Eastern Finland / University of Eastern Finland / Northern Savo Hospital District, Kuopio, Finland

Eija Laakkonen University of Jyväskylä, Jyväskylä, Finland

Samuel Heron University of Turku, Turku, Finland

Dhanaprakash Jambulingam University of Turku, Turku, Finland

Venkat Subramaniam Rathinakannan University of Turku, Turku, Finland

Nina Pitkänen Auria Biobank / University of Turku / Hospital District of Southwest Finland, Turku, Finland

#### Biobank directors

Lila Kallio Auria Biobank / University of Turku / Hospital District of Southwest Finland, Turku, Finland

Sirpa Soini THL Biobank / The National Institute of Health and Welfare Helsinki, Finland

Jukka Partanen Finnish Red Cross Blood Service / Finnish Hematology Registry and Clinical Biobank, Helsinki, Finland  
Eero Punkka Helsinki Biobank / Helsinki University and Hospital District of Helsinki and Uusimaa, Helsinki  
Raisa Serpi Northern Finland Biobank Borealis / University of Oulu / Northern Ostrobothnia Hospital District, Oulu, Finland  
Johanna Mäkelä Finnish Clinical Biobank Tampere / University of Tampere / Pirkanmaa Hospital District, Tampere, Finland  
Veli-Matti Kosma Biobank of Eastern Finland / University of Eastern Finland / Northern Savo Hospital District, Kuopio, Finland  
Teijo Kuopio Central Finland Biobank / University of Jyväskylä / Central Finland Health Care District, Jyväskylä, Finland

### **FinnGen Teams**

#### **Administration**

Anu Jalanko Institute for Molecular Medicine Finland, HiLIFE, University of Helsinki, Finland  
Huei-Yi Shen Institute for Molecular Medicine Finland, HiLIFE, University of Helsinki, Finland  
Risto Kajanne Institute for Molecular Medicine Finland, HiLIFE, University of Helsinki, Finland  
Mervi Aavikko Institute for Molecular Medicine Finland, HiLIFE, University of Helsinki, Finland

#### **Analysis**

Mitja Kurki Institute for Molecular Medicine Finland, HiLIFE, University of Helsinki, Finland / Broad Institute, Cambridge, MA, United States  
Juha Karjalainen Institute for Molecular Medicine Finland, HiLIFE, University of Helsinki, Finland / Broad Institute, Cambridge, MA, United States  
Pietro Della Briotta Parolo Institute for Molecular Medicine Finland, HiLIFE, University of Helsinki, Finland  
Arto Lehisto Institute for Molecular Medicine Finland, HiLIFE, University of Helsinki, Finland  
Juha Mehtonen Institute for Molecular Medicine Finland, HiLIFE, University of Helsinki, Finland  
Wei Zhou Broad Institute, Cambridge, MA, United States  
Masahiro Kanai Broad Institute, Cambridge, MA, United States  
Mutaamba Maasha Broad Institute, Cambridge, MA, United States

#### **Clinical Endpoint Development**

Hannele Laivuori Institute for Molecular Medicine Finland, HiLIFE, University of Helsinki, Finland  
Aki Havulinna Institute for Molecular Medicine Finland, HiLIFE, University of Helsinki, Finland

Susanna Lemmelä  
Finland Institute for Molecular Medicine Finland, HiLIFE, University of Helsinki,  
Tuomo Kiiskinen Institute for Molecular Medicine Finland, HiLIFE, University of Helsinki,  
Finland  
L. Elisa Lahtela Institute for Molecular Medicine Finland, HiLIFE, University of  
Helsinki, Finland  
Matti Peura Institute for Molecular Medicine Finland, HiLIFE, University of Helsinki,  
Finland

### Communication

Mari Kaunisto Institute for Molecular Medicine Finland, HiLIFE, University of Helsinki,  
Finland

### Data Management and IT Infrastructure

Elina Kilpeläinen Institute for Molecular Medicine Finland, HiLIFE, University of Helsinki,  
Finland  
Timo P. Sipilä Institute for Molecular Medicine Finland, HiLIFE, University of Helsinki,  
Finland  
Georg Brein Institute for Molecular Medicine Finland, HiLIFE, University of Helsinki,  
Finland  
Oluwaseun A. Dada Institute for Molecular Medicine Finland, HiLIFE, University of Helsinki,  
Finland  
Awaisa Ghazal Institute for Molecular Medicine Finland, HiLIFE, University of Helsinki,  
Finland  
Anastasia Shcherban Institute for Molecular Medicine Finland, HiLIFE, University of Helsinki,  
Finland

### Genotyping

Kati Donner Institute for Molecular Medicine Finland, HiLIFE, University of Helsinki,  
Finland  
Timo P. Sipilä Institute for Molecular Medicine Finland, HiLIFE, University of Helsinki,  
Finland

### Sample Collection Coordination

Anu Loukola Helsinki Biobank / Helsinki University and Hospital District of Helsinki and  
Uusimaa, Helsinki

### Sample Logistics

Päivi Laiho THL Biobank / The National Institute of Health and Welfare Helsinki,  
Finland  
Tuuli Sistonen THL Biobank / The National Institute of Health and Welfare Helsinki,  
Finland  
Essi Kaiharju THL Biobank / The National Institute of Health and Welfare Helsinki,  
Finland  
Markku Laukkanen THL Biobank / The National Institute of Health and Welfare Helsinki,  
Finland

Elina Järvensivu THL Biobank / The National Institute of Health and Welfare  
Helsinki, Finland  
Sini Lähteenmäki THL Biobank / The National Institute of Health and Welfare Helsinki,  
Finland  
Lotta Männikkö THL Biobank / The National Institute of Health and Welfare  
Helsinki, Finland  
Regis Wong THL Biobank / The National Institute of Health and Welfare Helsinki,  
Finland

### Registry Data Operations

Hannele Mattsson THL Biobank / The National Institute of Health and Welfare Helsinki,  
Finland  
Kati Kristiansson THL Biobank / The National Institute of Health and Welfare Helsinki,  
Finland  
Susanna Lemmelä Institute for Molecular Medicine Finland, HiLIFE, University of Helsinki,  
Finland  
Sami Koskelainen THL Biobank / The National Institute of Health and Welfare Helsinki,  
Finland  
Tero Hiekkalinna THL Biobank / The National Institute of Health and Welfare Helsinki,  
Finland  
Teemu Paajanen THL Biobank / The National Institute of Health and Welfare  
Helsinki, Finland

### Sequencing Informatics

Priit Palta Institute for Molecular Medicine Finland, HiLIFE, University of Helsinki,  
Finland  
Kalle Pärn Institute for Molecular Medicine Finland, HiLIFE, University of Helsinki,  
Finland  
Shuang Luo Institute for Molecular Medicine Finland, HiLIFE, University of Helsinki,  
Finland  
Vishal Sinha Institute for Molecular Medicine Finland, HiLIFE, University of Helsinki,  
Finland

### Trajectory Team

Tarja Laitinen Pirkanmaa Hospital District, Tampere, Finland  
Harri Siirtola University of Tampere, Tampere, Finland  
Javier Gracia-Tabuenca University of Tampere, Tampere, Finland  
Mika Helminen University of Tampere, Tampere, Finland  
Tiina Luukkaala University of Tampere, Tampere, Finland  
Iida Vähätalo University of Tampere, Tampere, Finland

### Data protection officer

Tero Jyrhämä Institute for Molecular Medicine Finland, HiLIFE, University of Helsinki,  
Finland

### FinBB - Finnish biobank cooperative

Marco Hautalahti  
Laura Mustaniemi  
Mirkka Koivusalo  
Sarah Smith  
Tom Southerington
